# Supplementary material for: Design, synthesis and biological evaluation of a macrocyclic discodermolide/dictyostatin hybrid
Source: Royal Society of Chemistry journal article supplement (doi:10.1039/b615122a), 2006-11-23

*Electronic Supporting Information*

**Design, Synthesis and Biological Evaluation of a Macrocyclic  
Discodermolide/Dictyostatin Hybrid**

Ian Paterson,<sup>\*</sup> Nicola Gardner

*University Chemical Laboratory, Lensfield Road, Cambridge, CB2 1EW, United  
Kingdom*

<sup>1</sup>H and <sup>13</sup>C NMR Data for  
compounds **10 - 15** and **3**

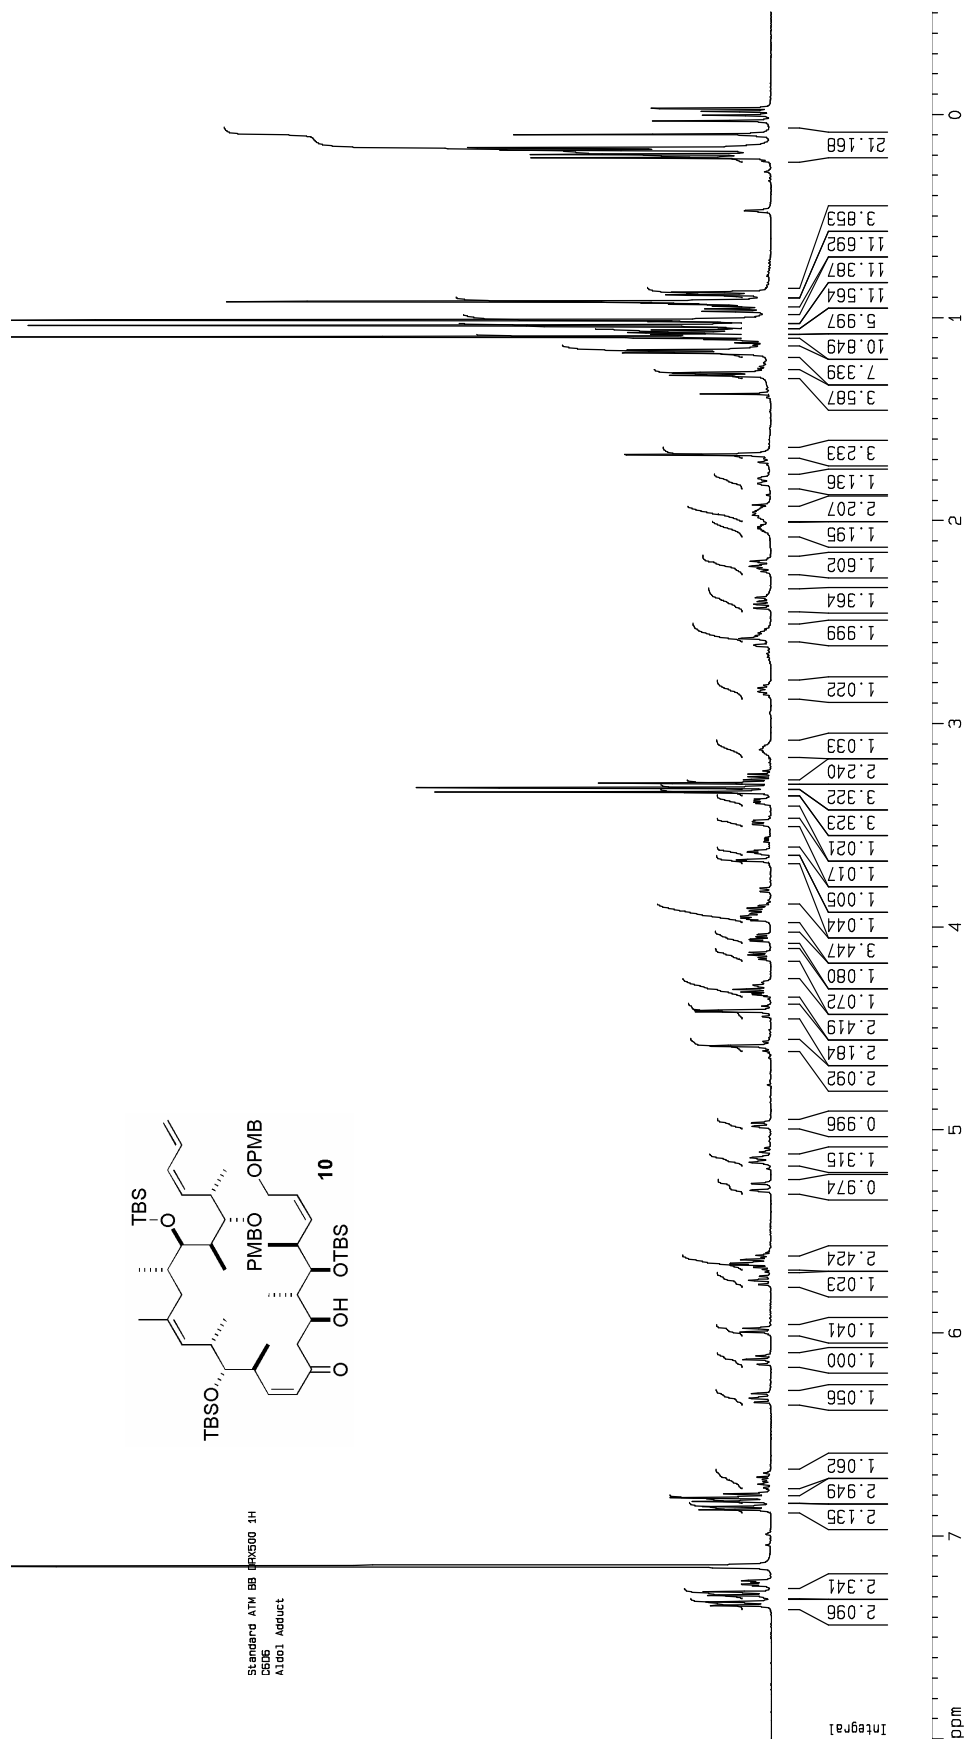

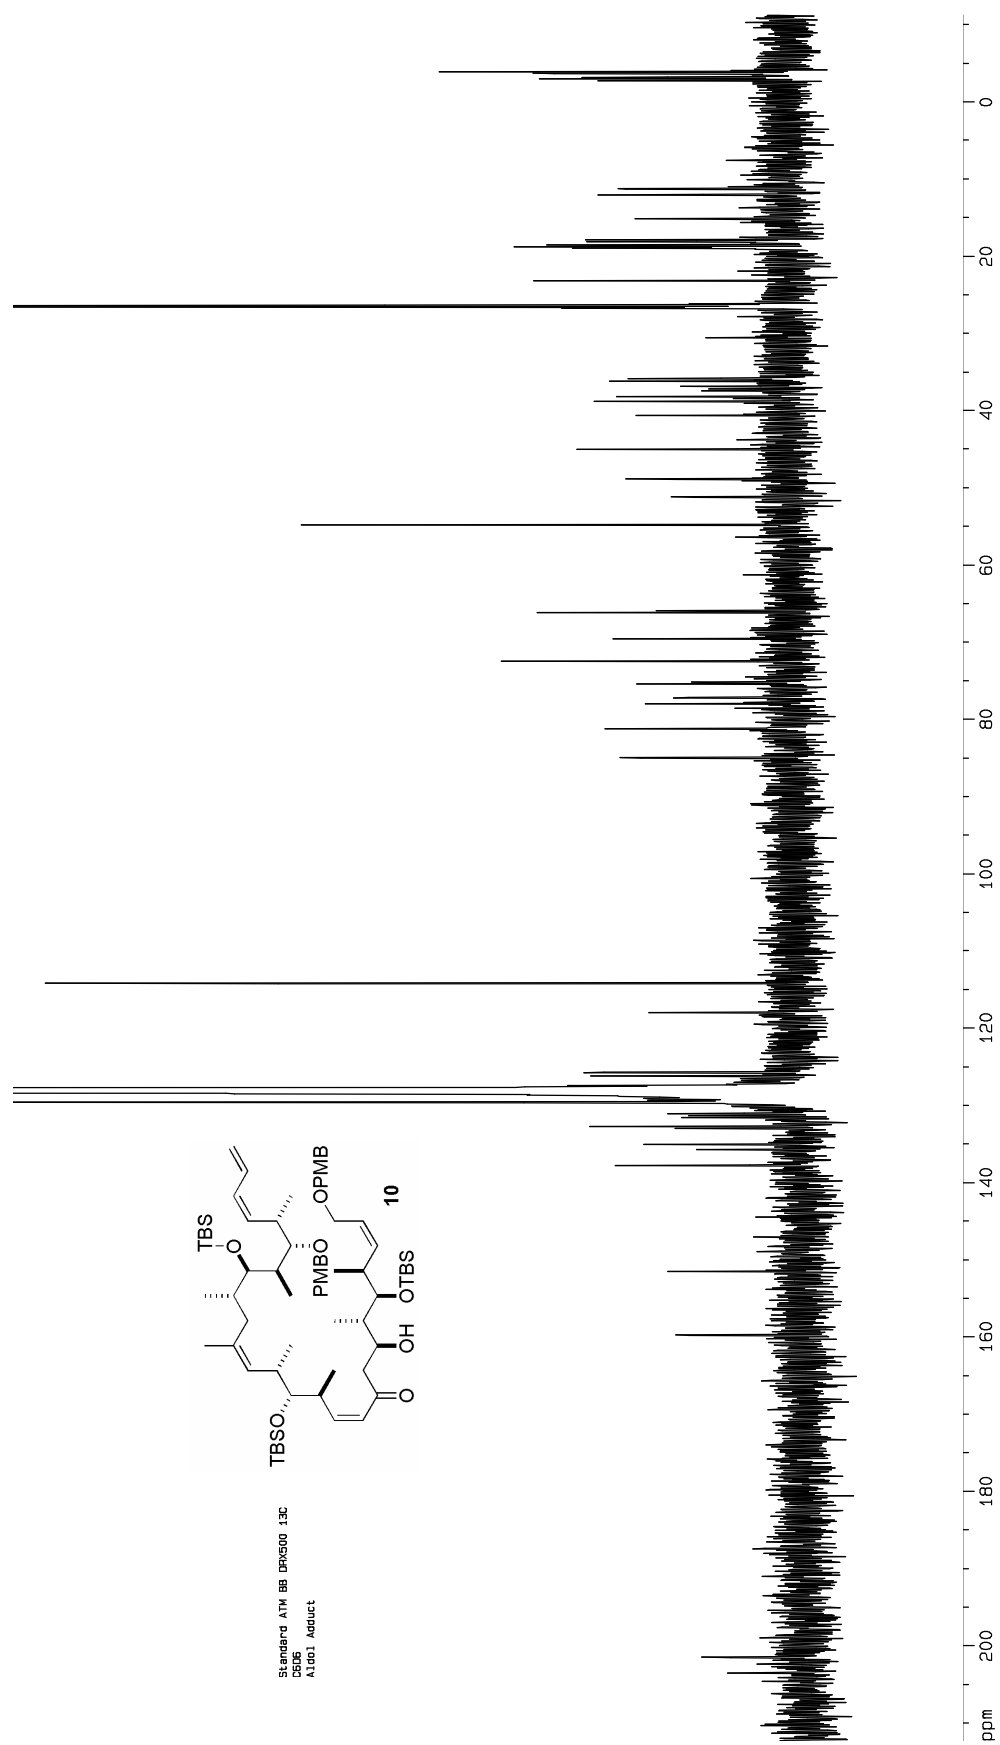

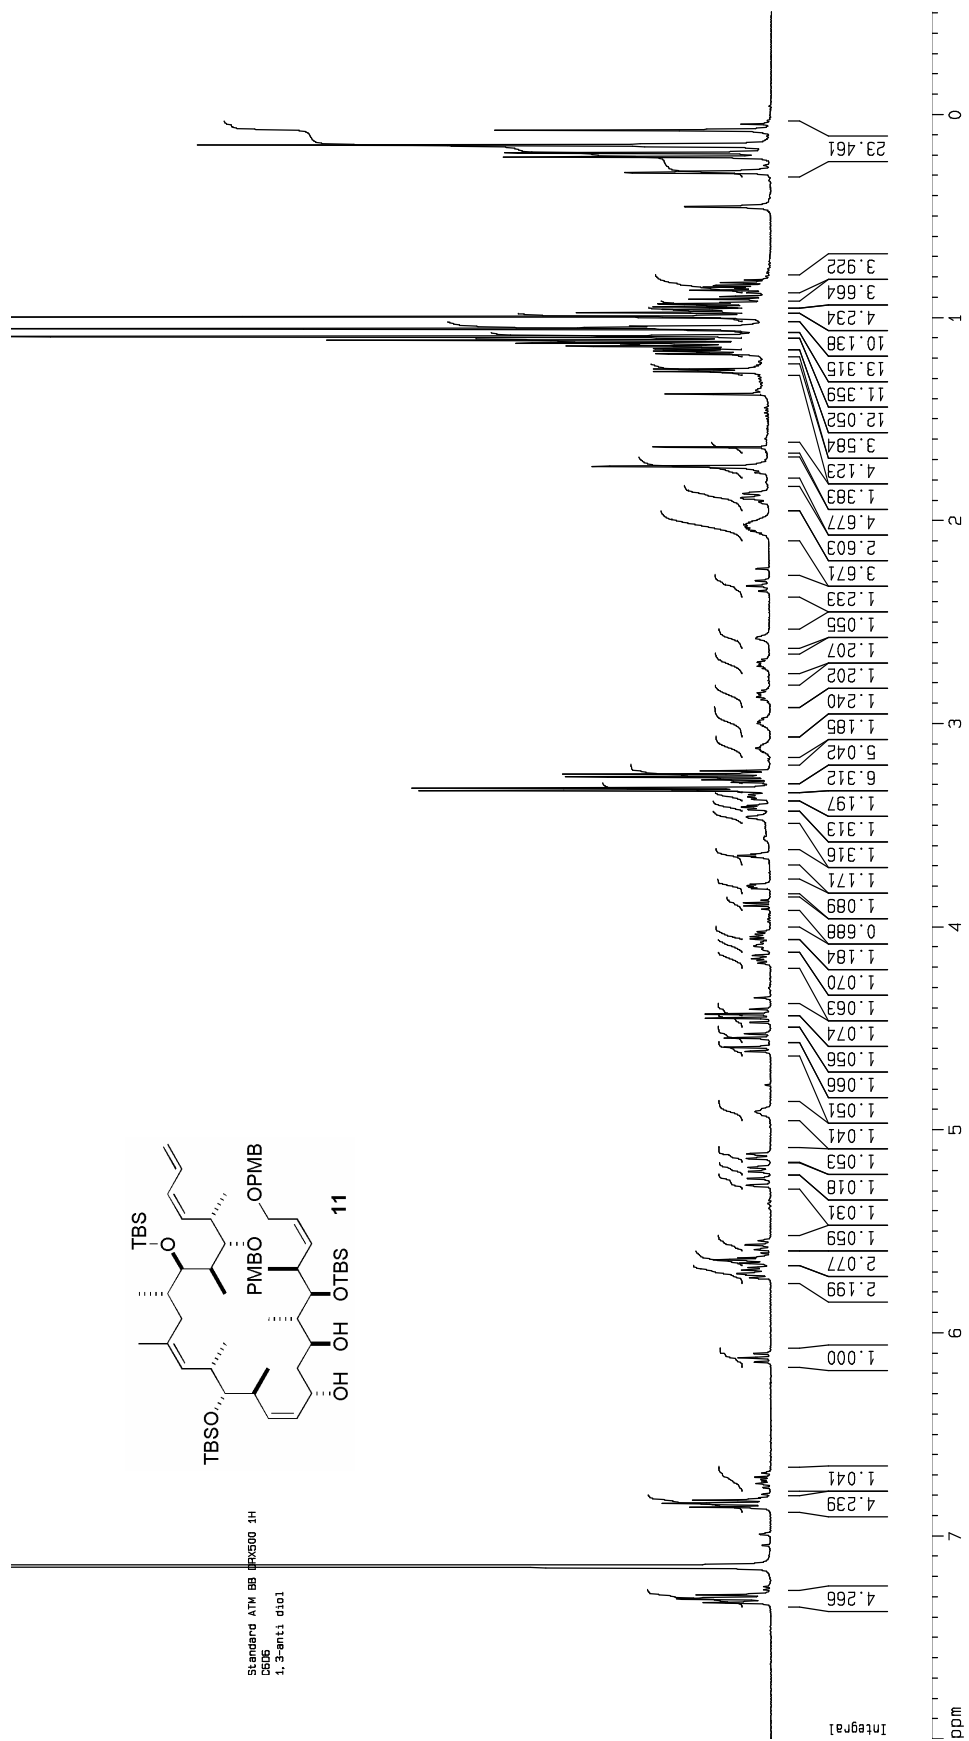

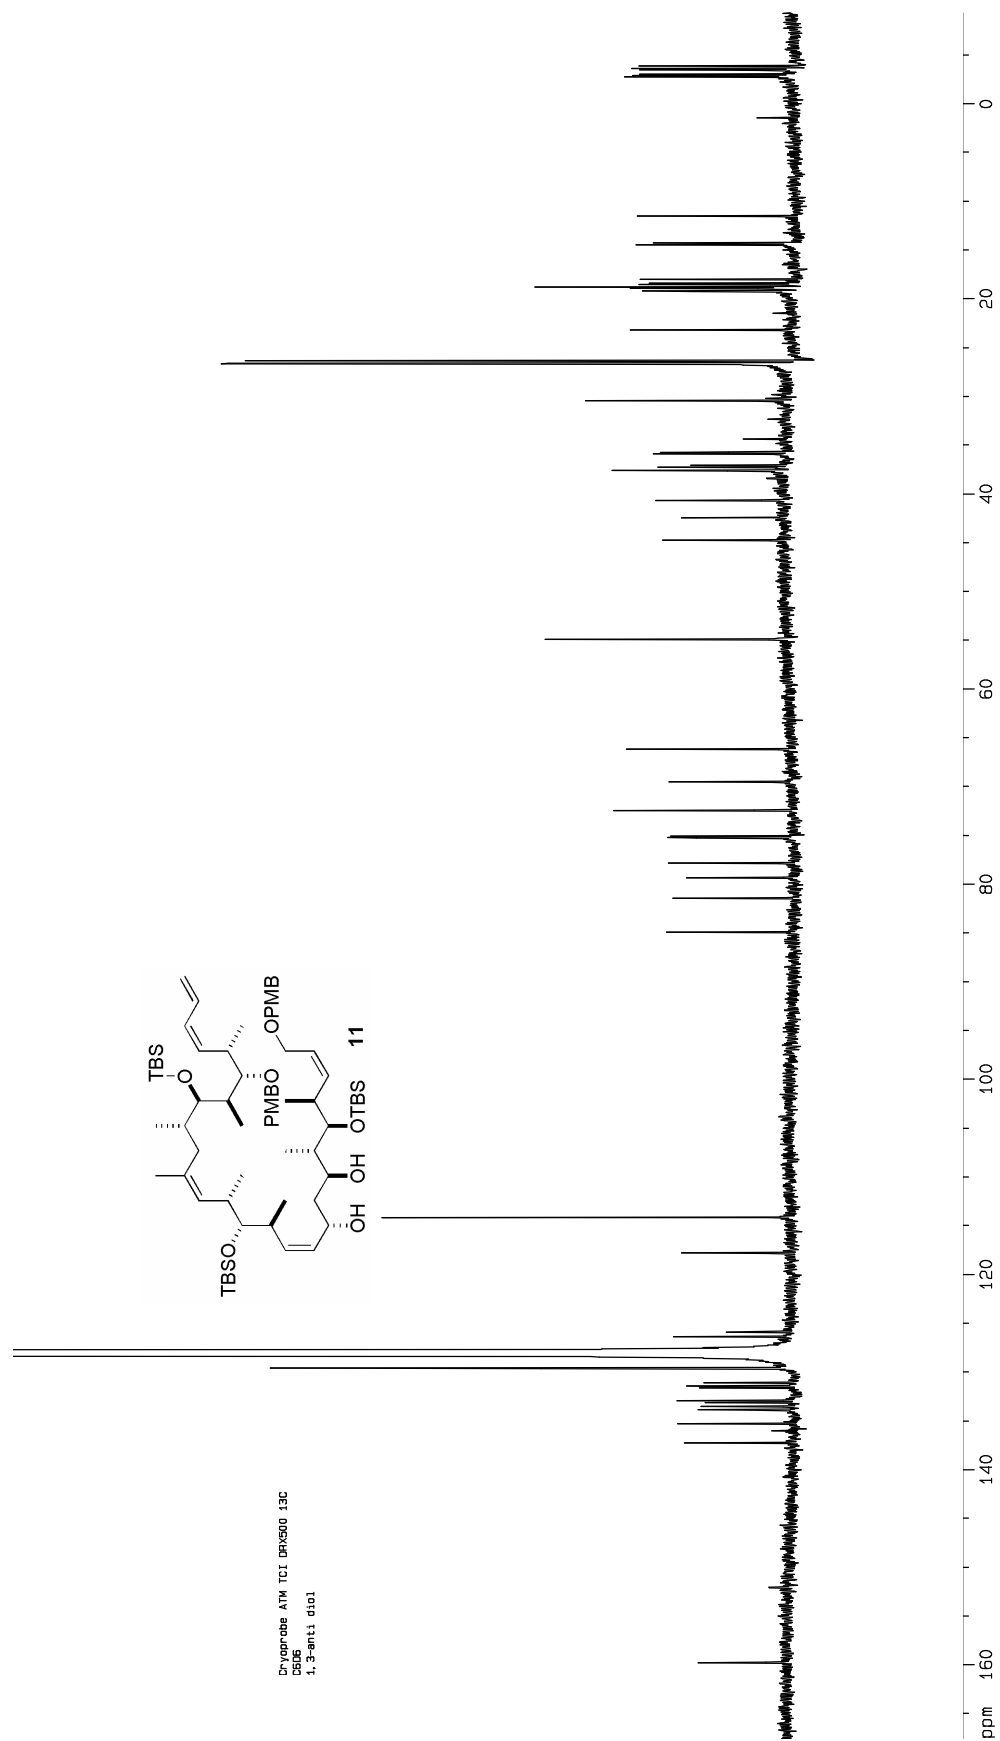

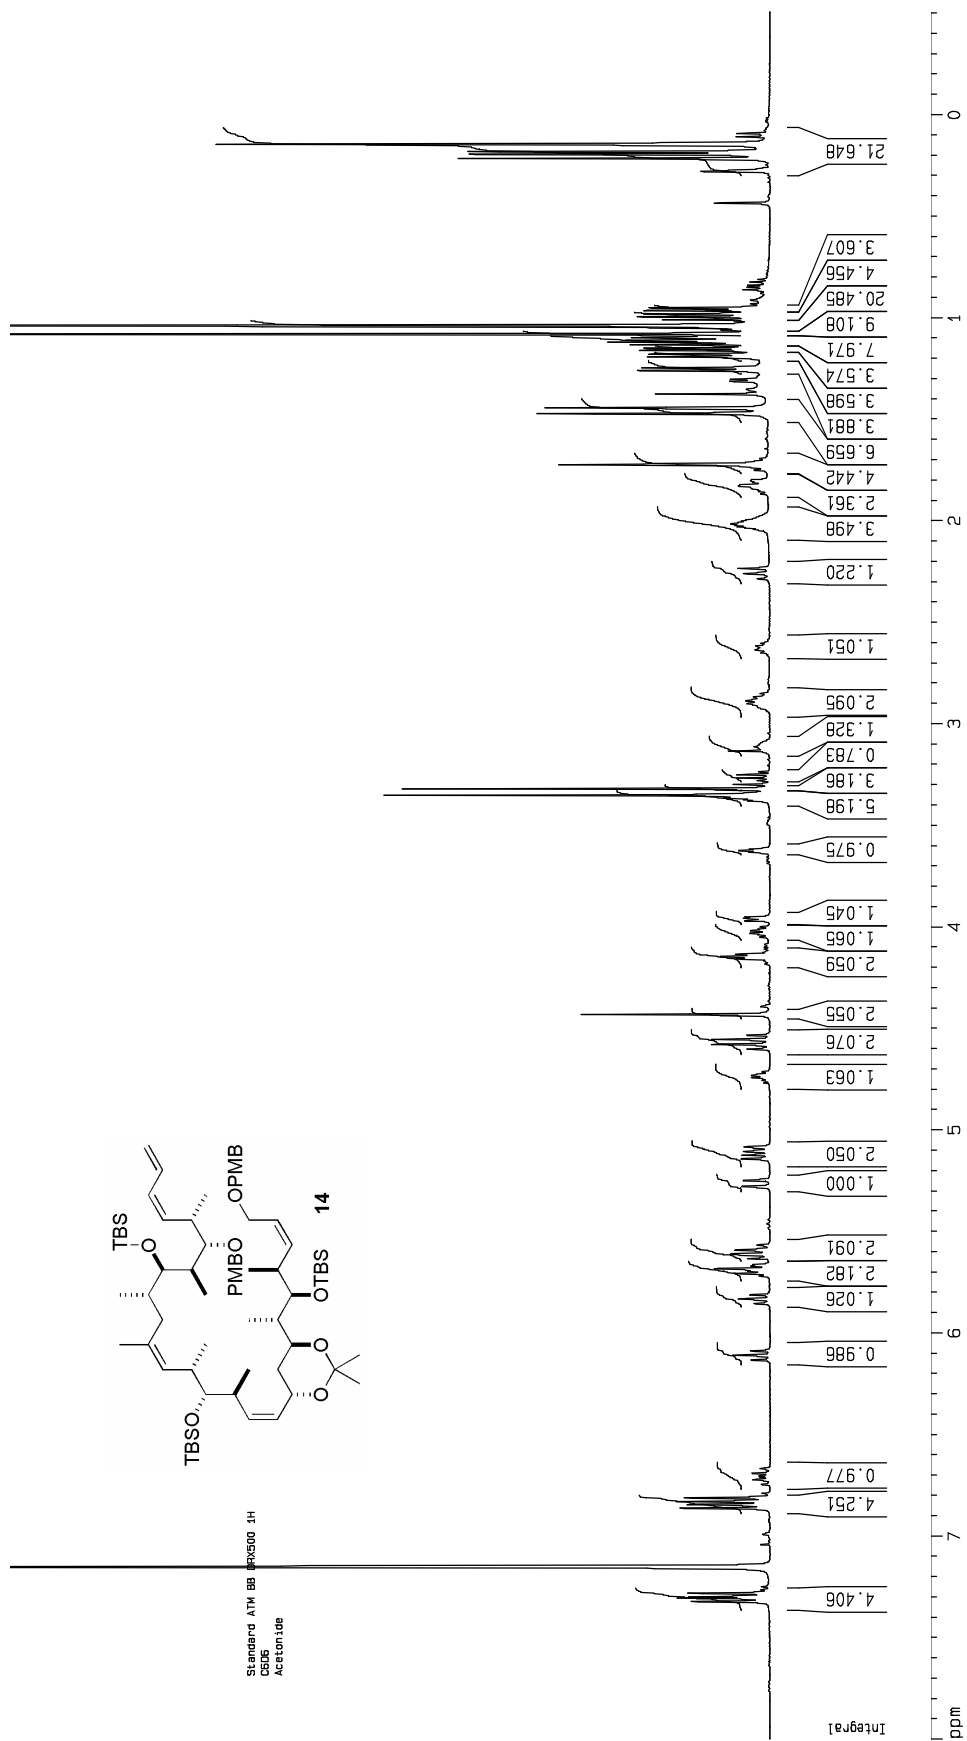

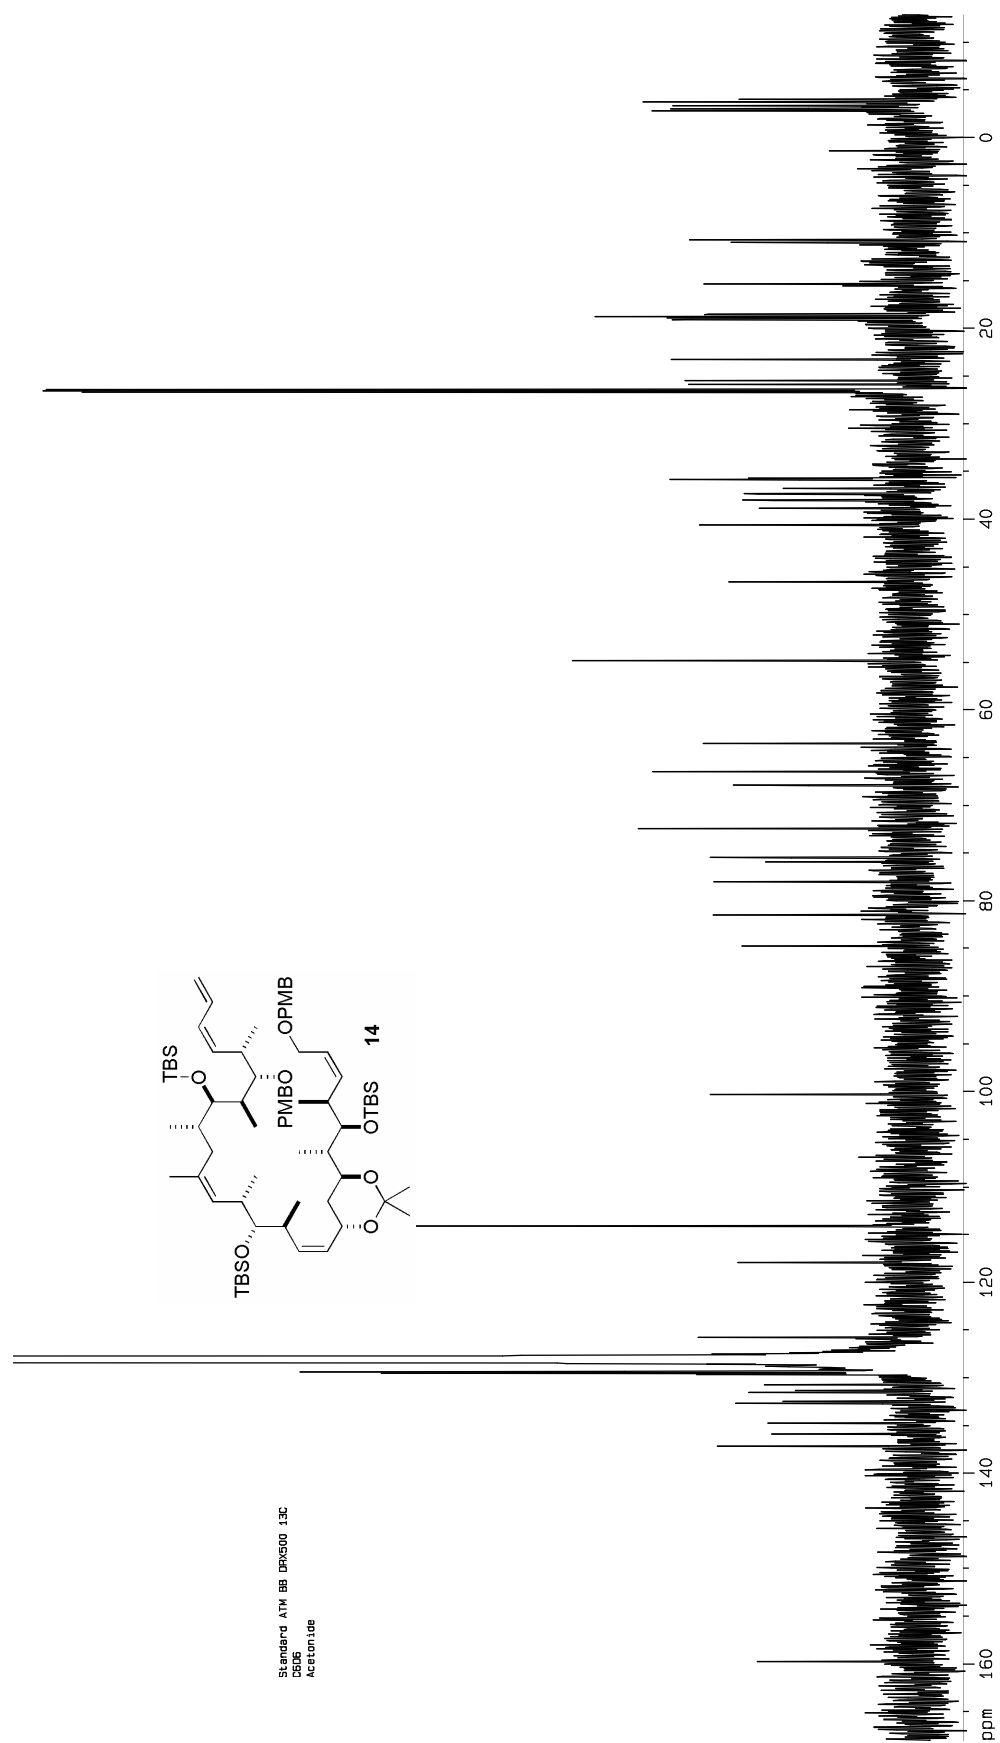

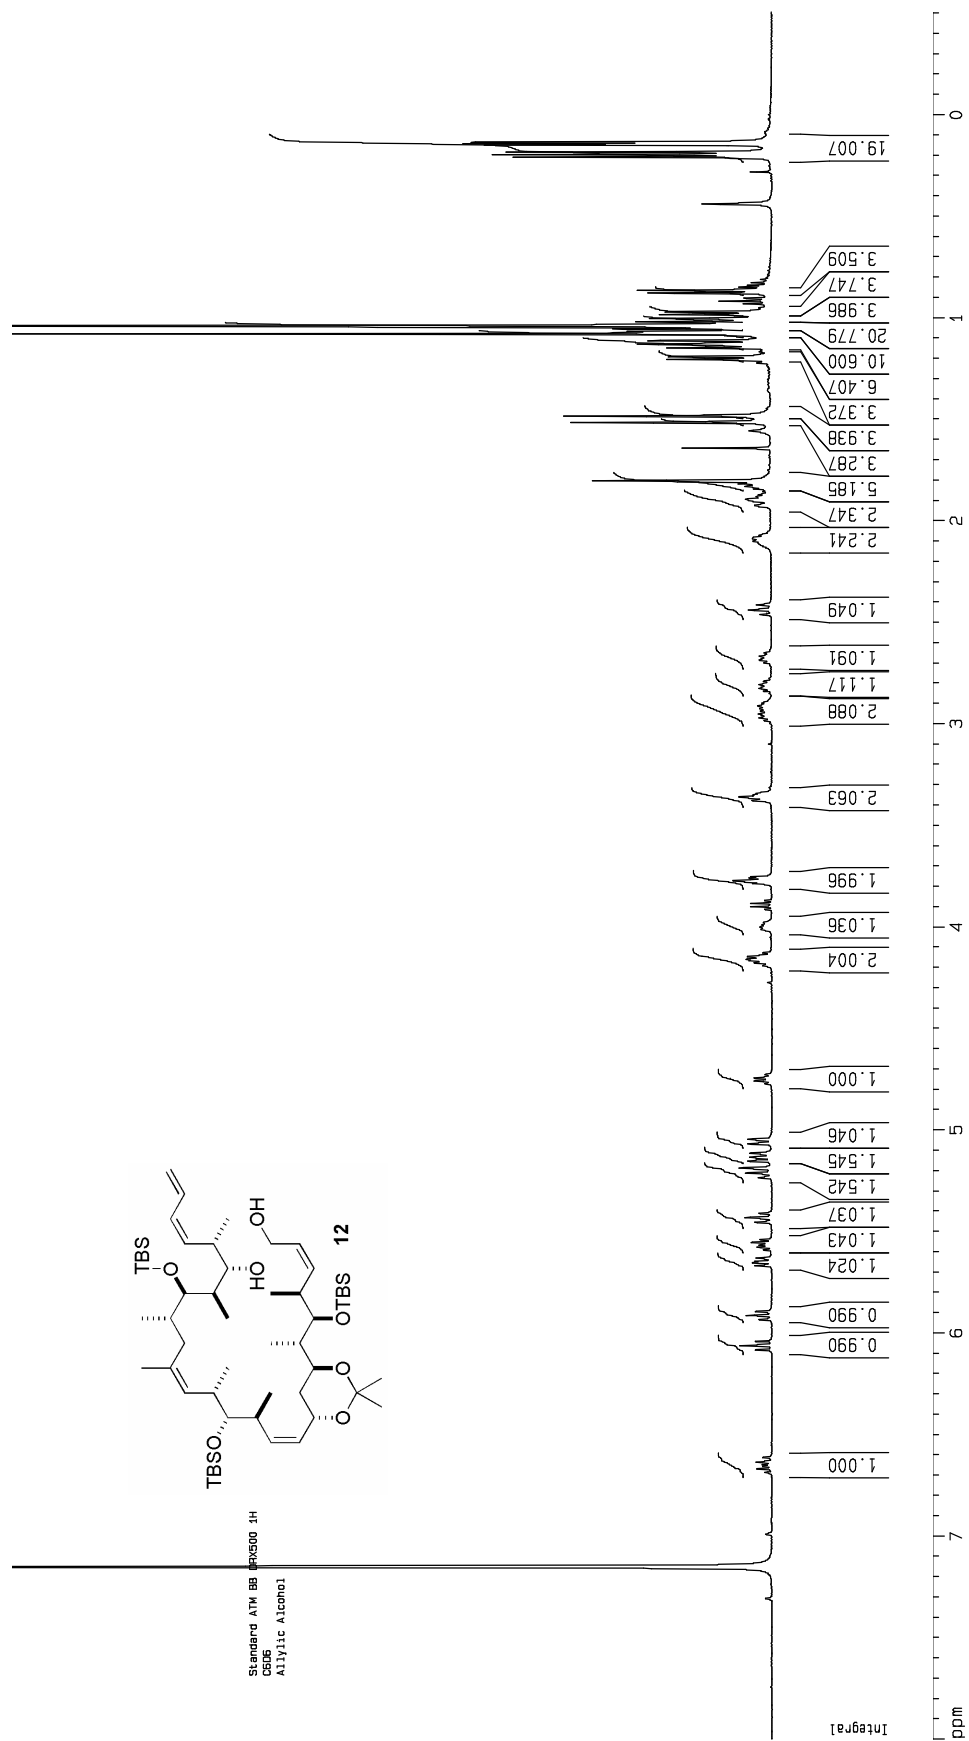



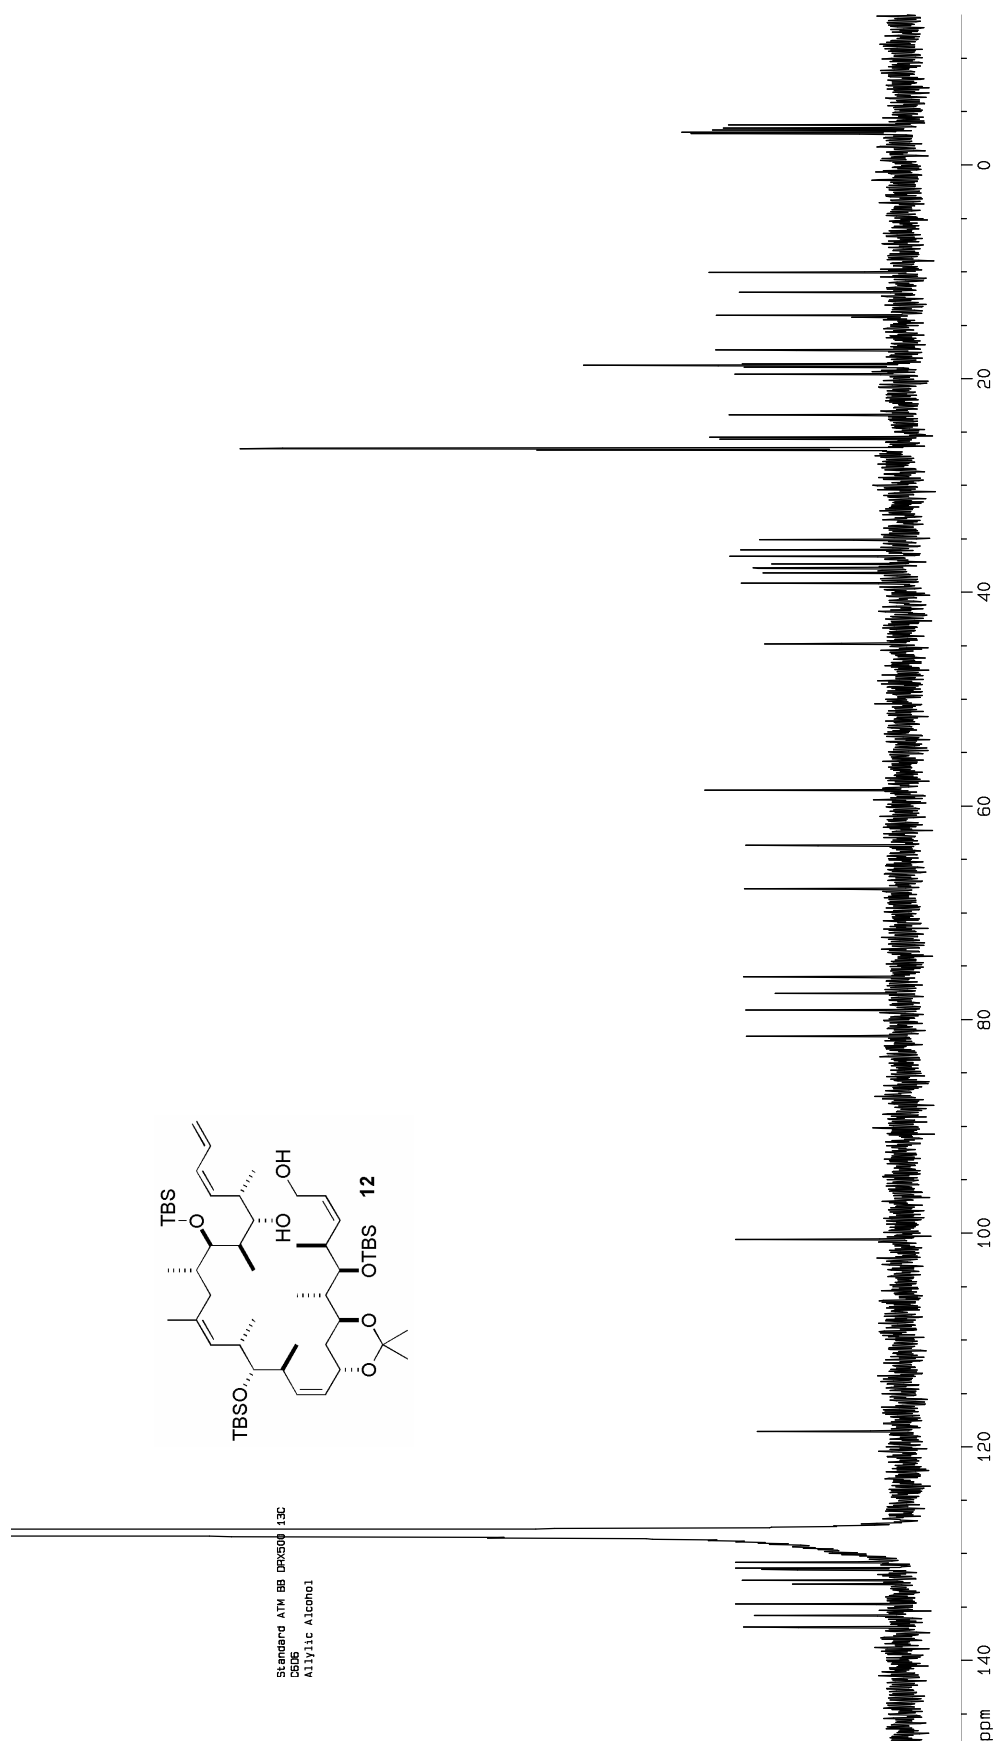

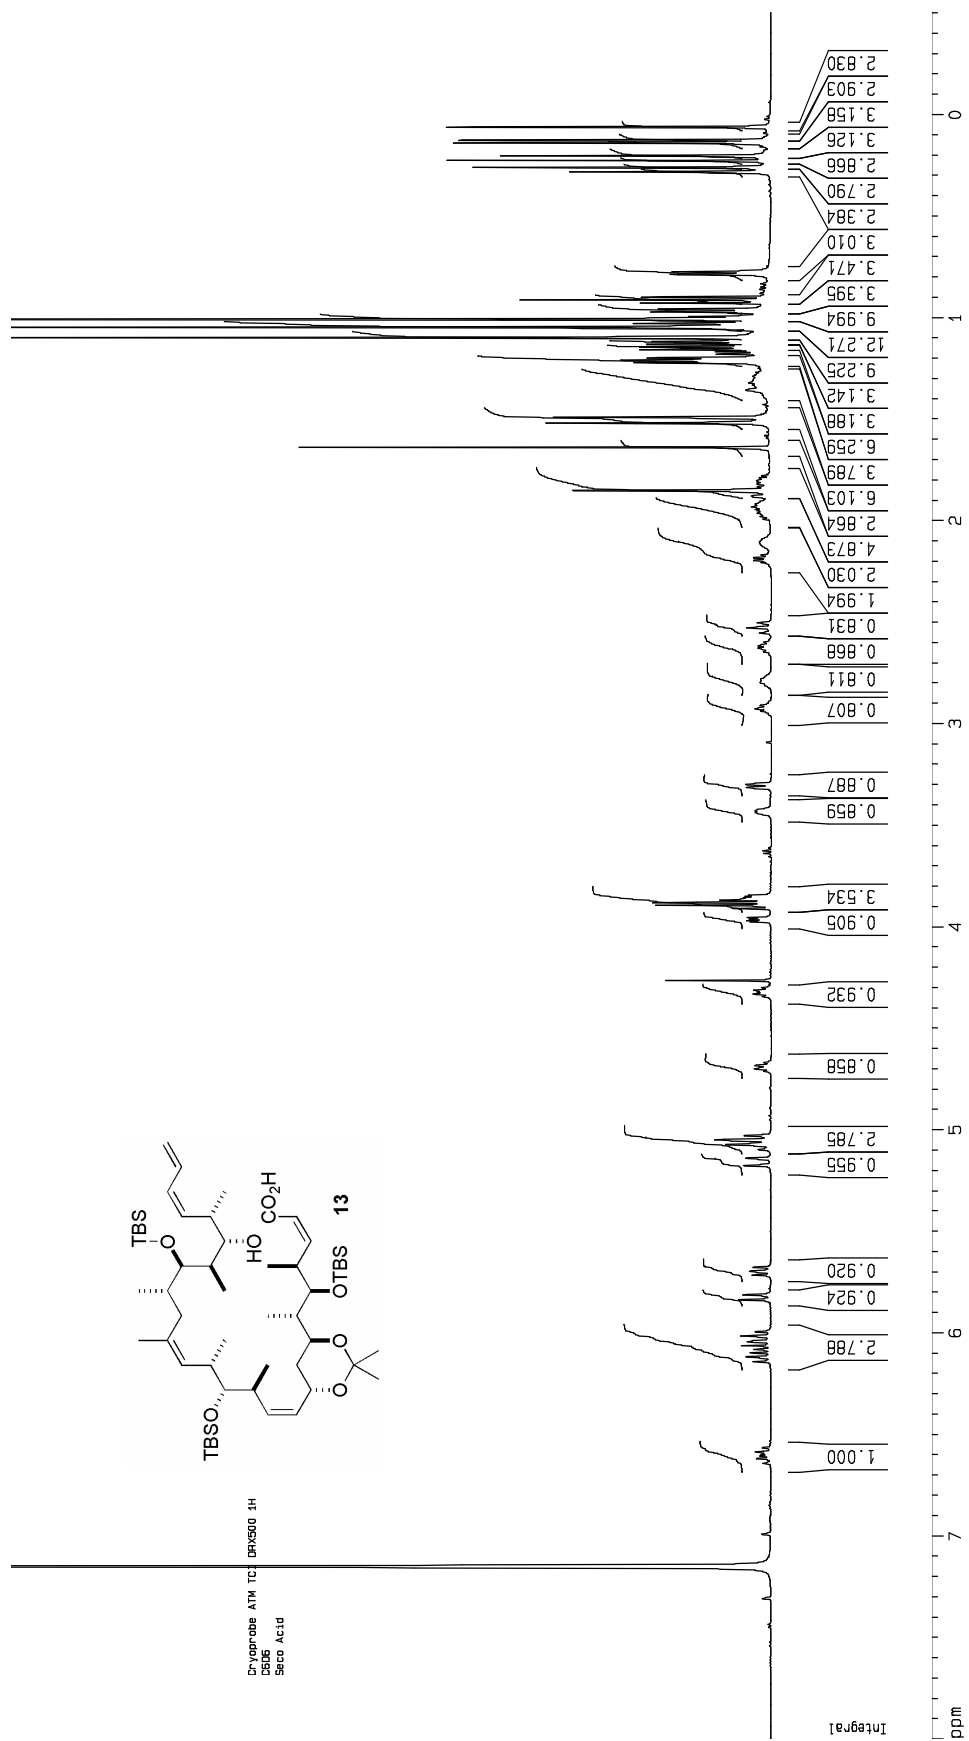

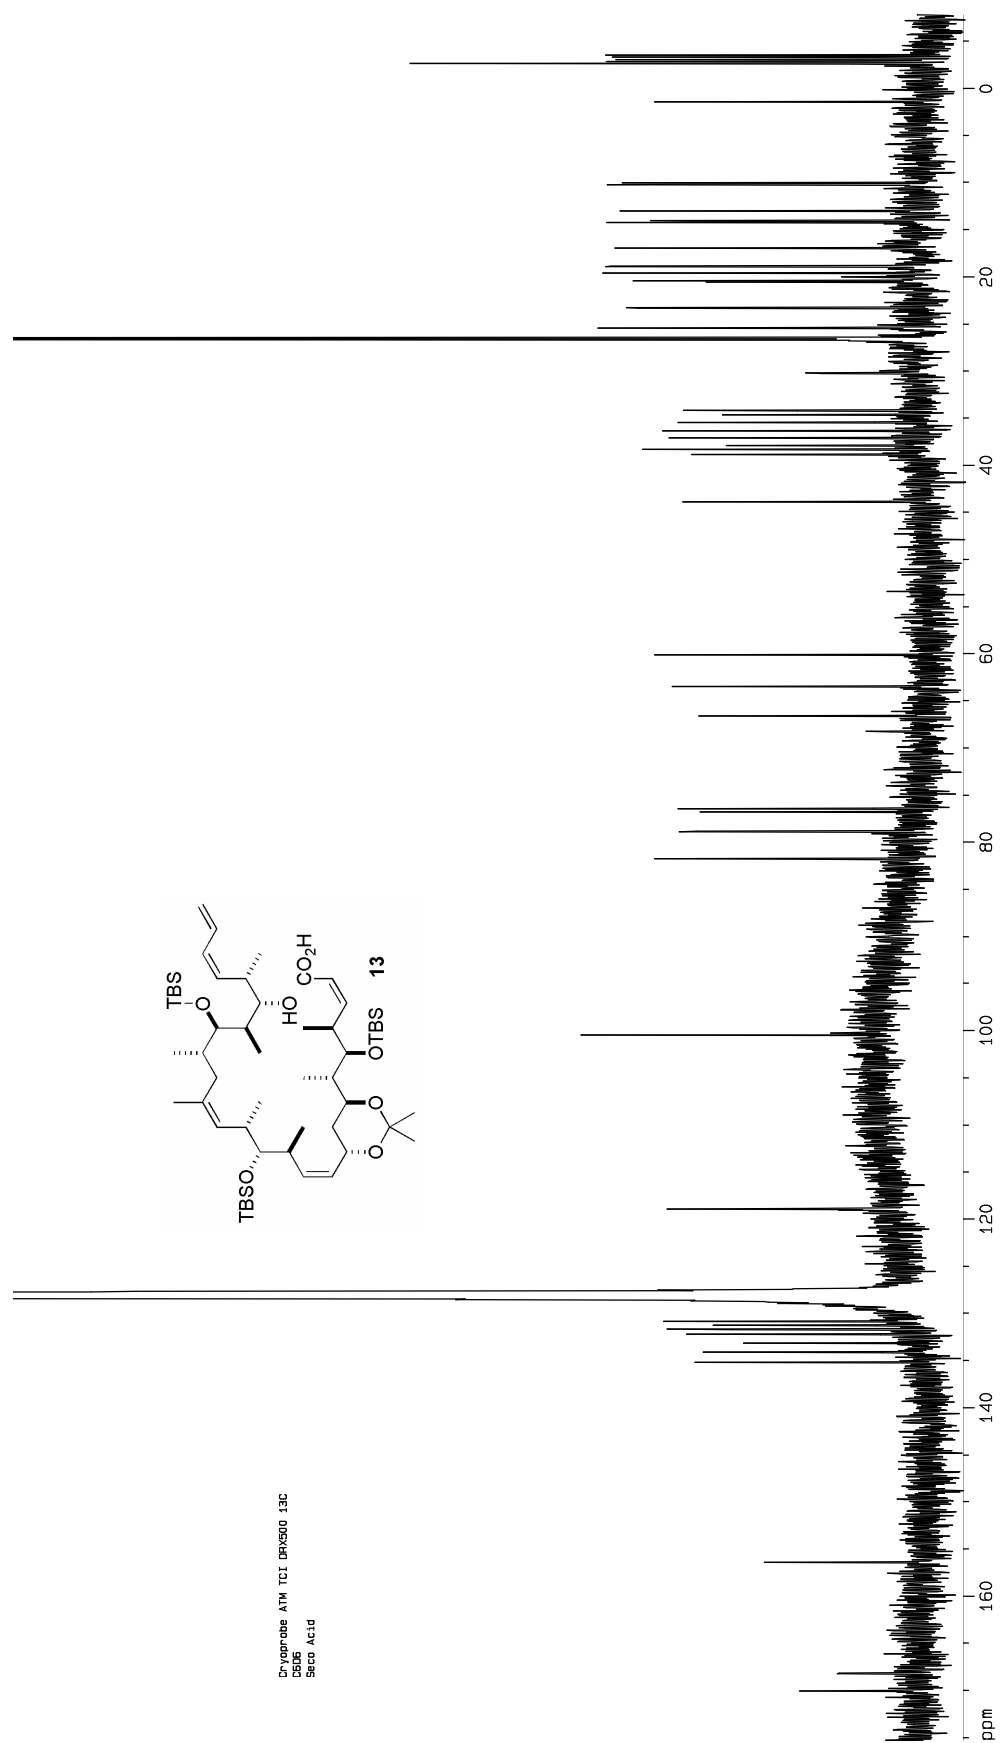

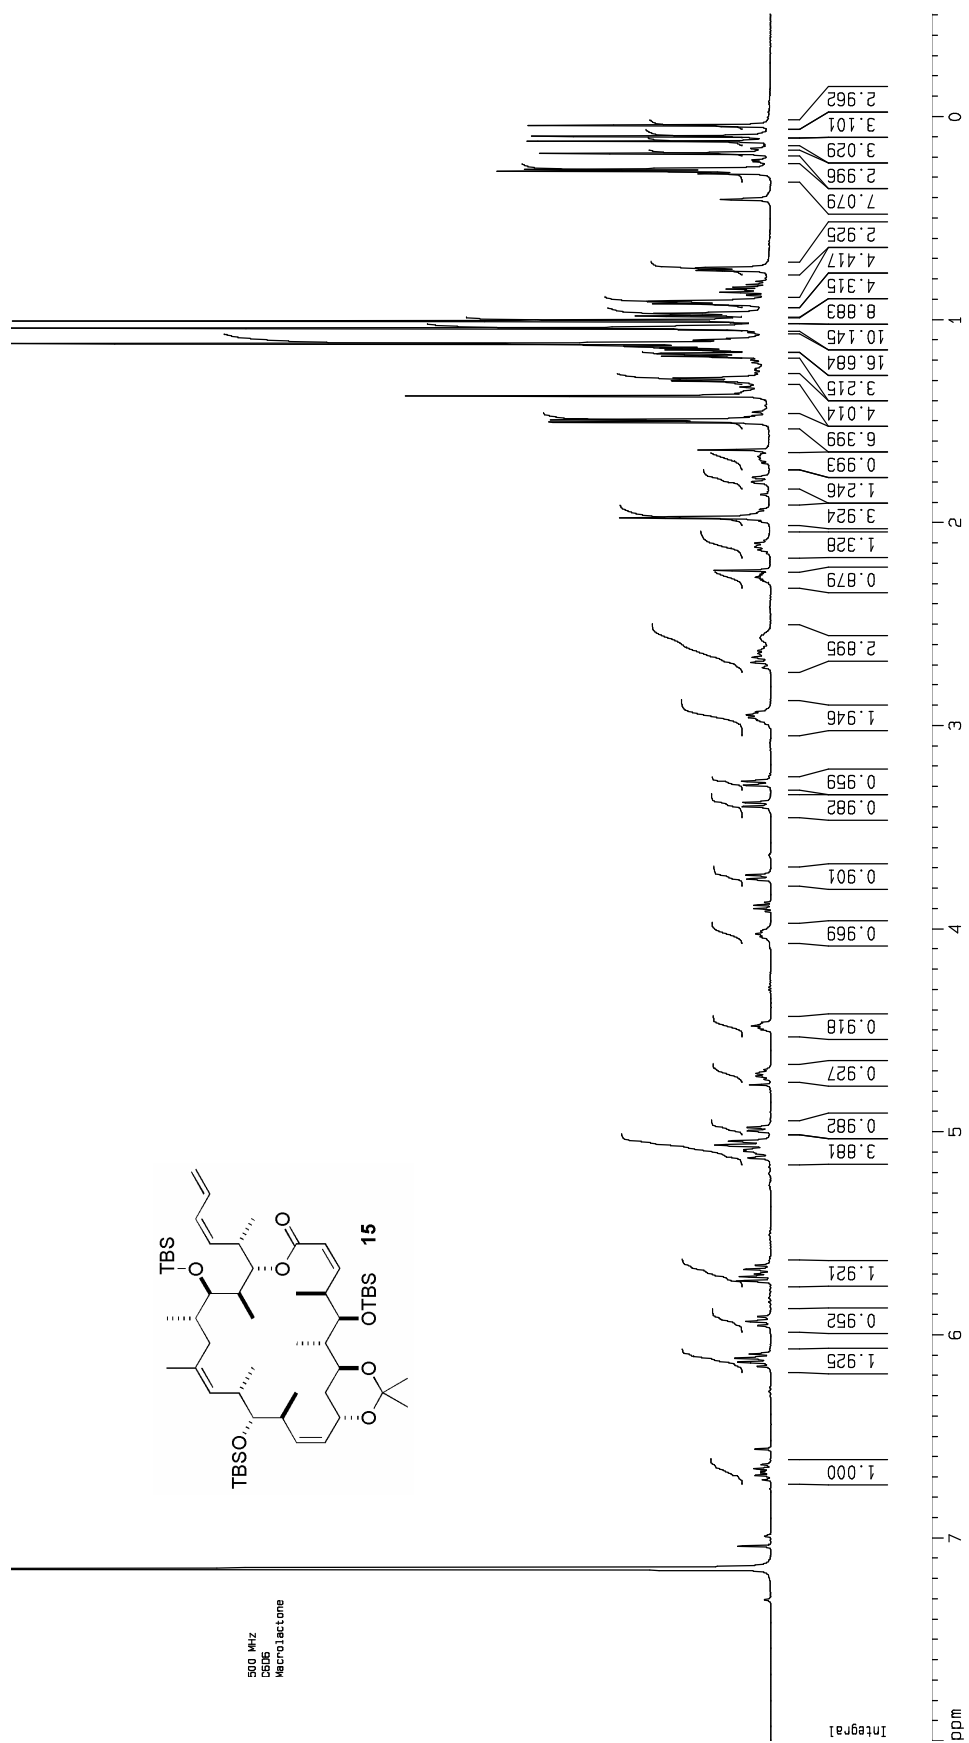

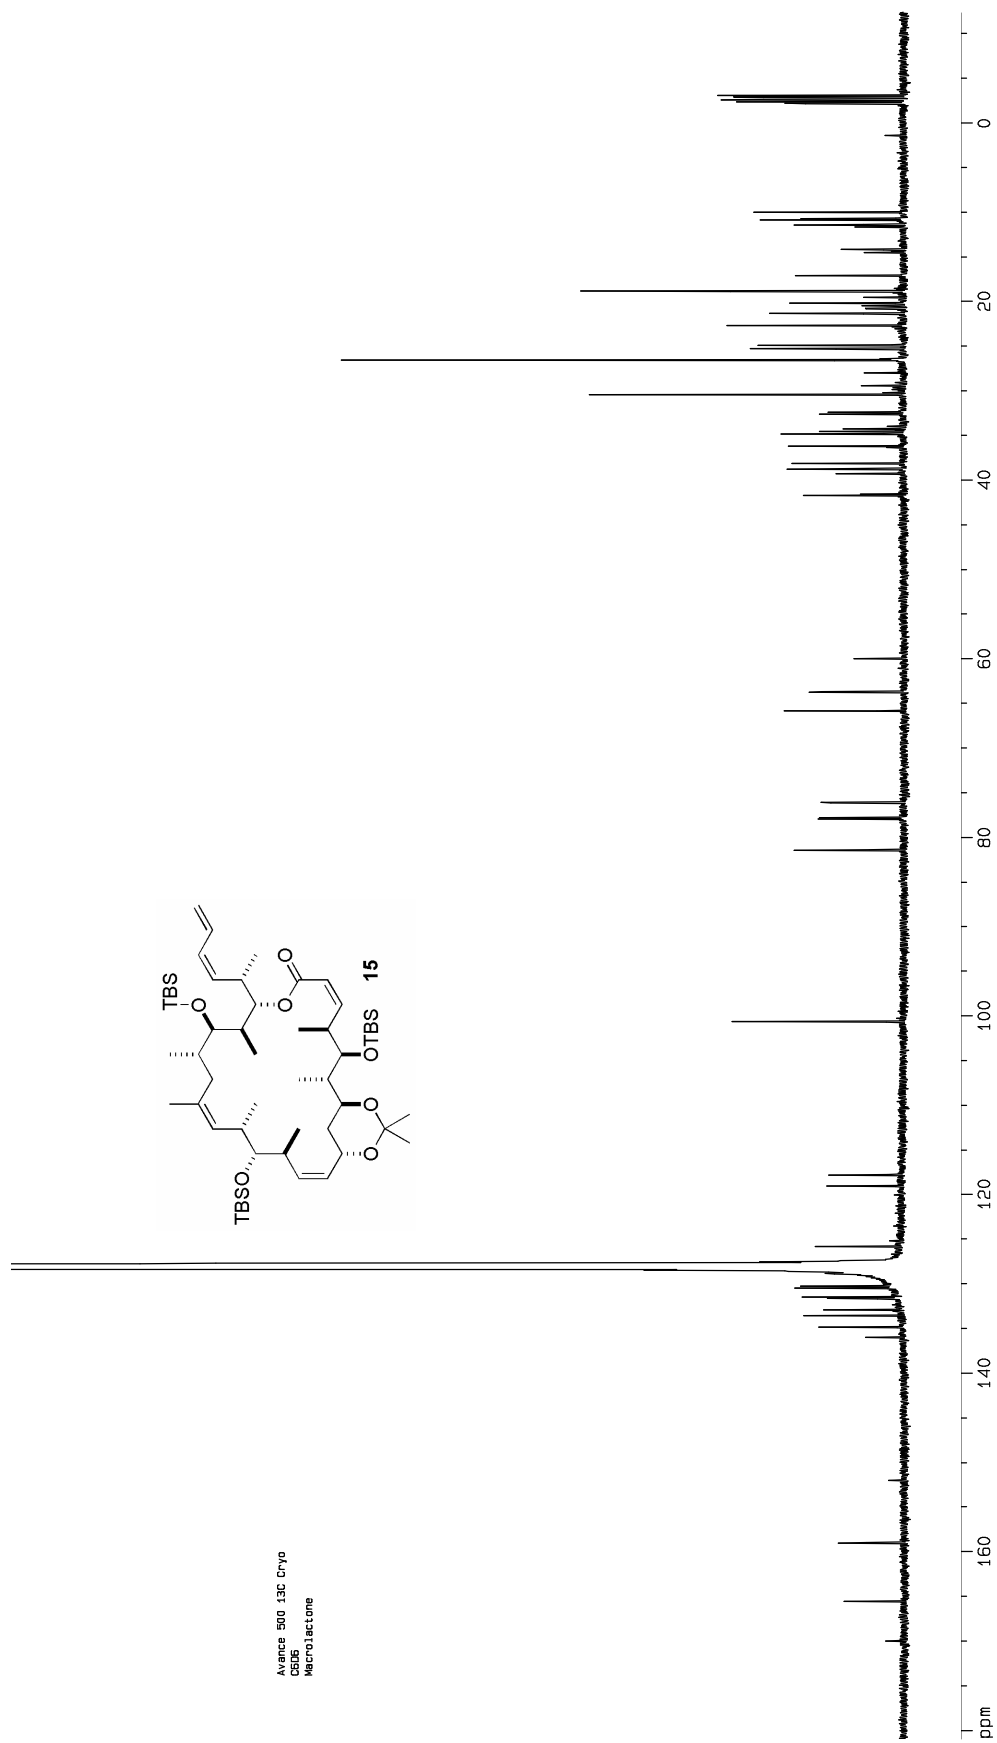

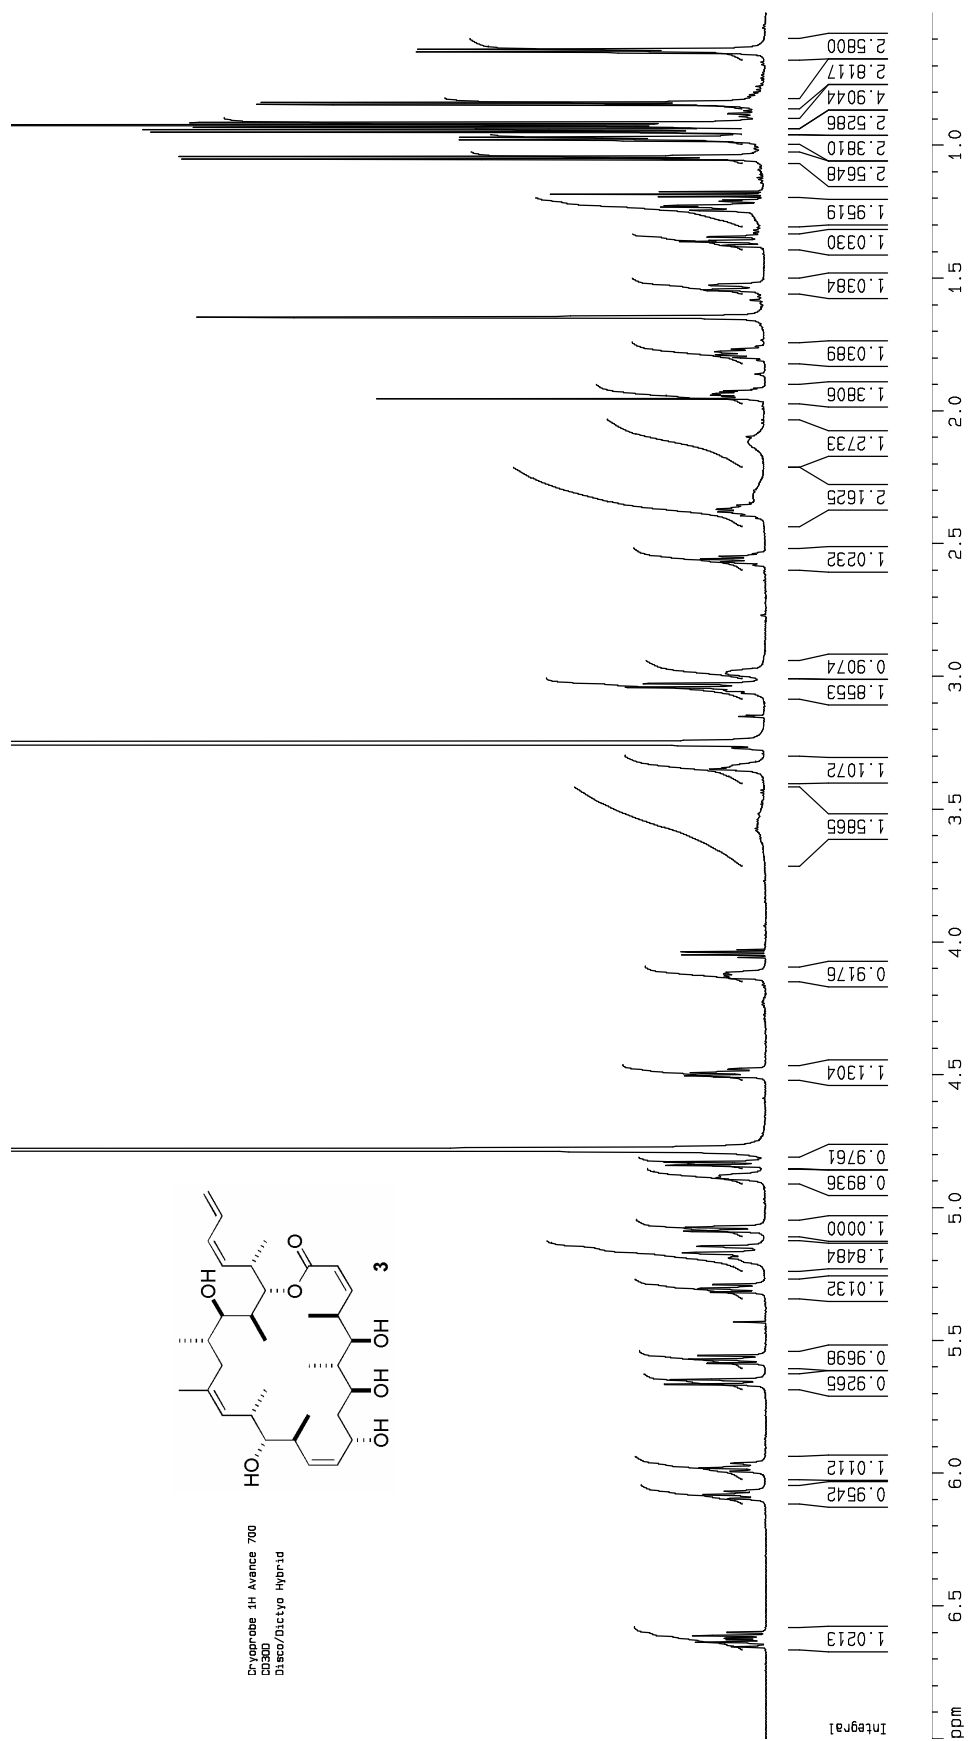

Dr. Yoonbe Ah, Avance 700  
D3300  
Disco/Dictyo Hybrid

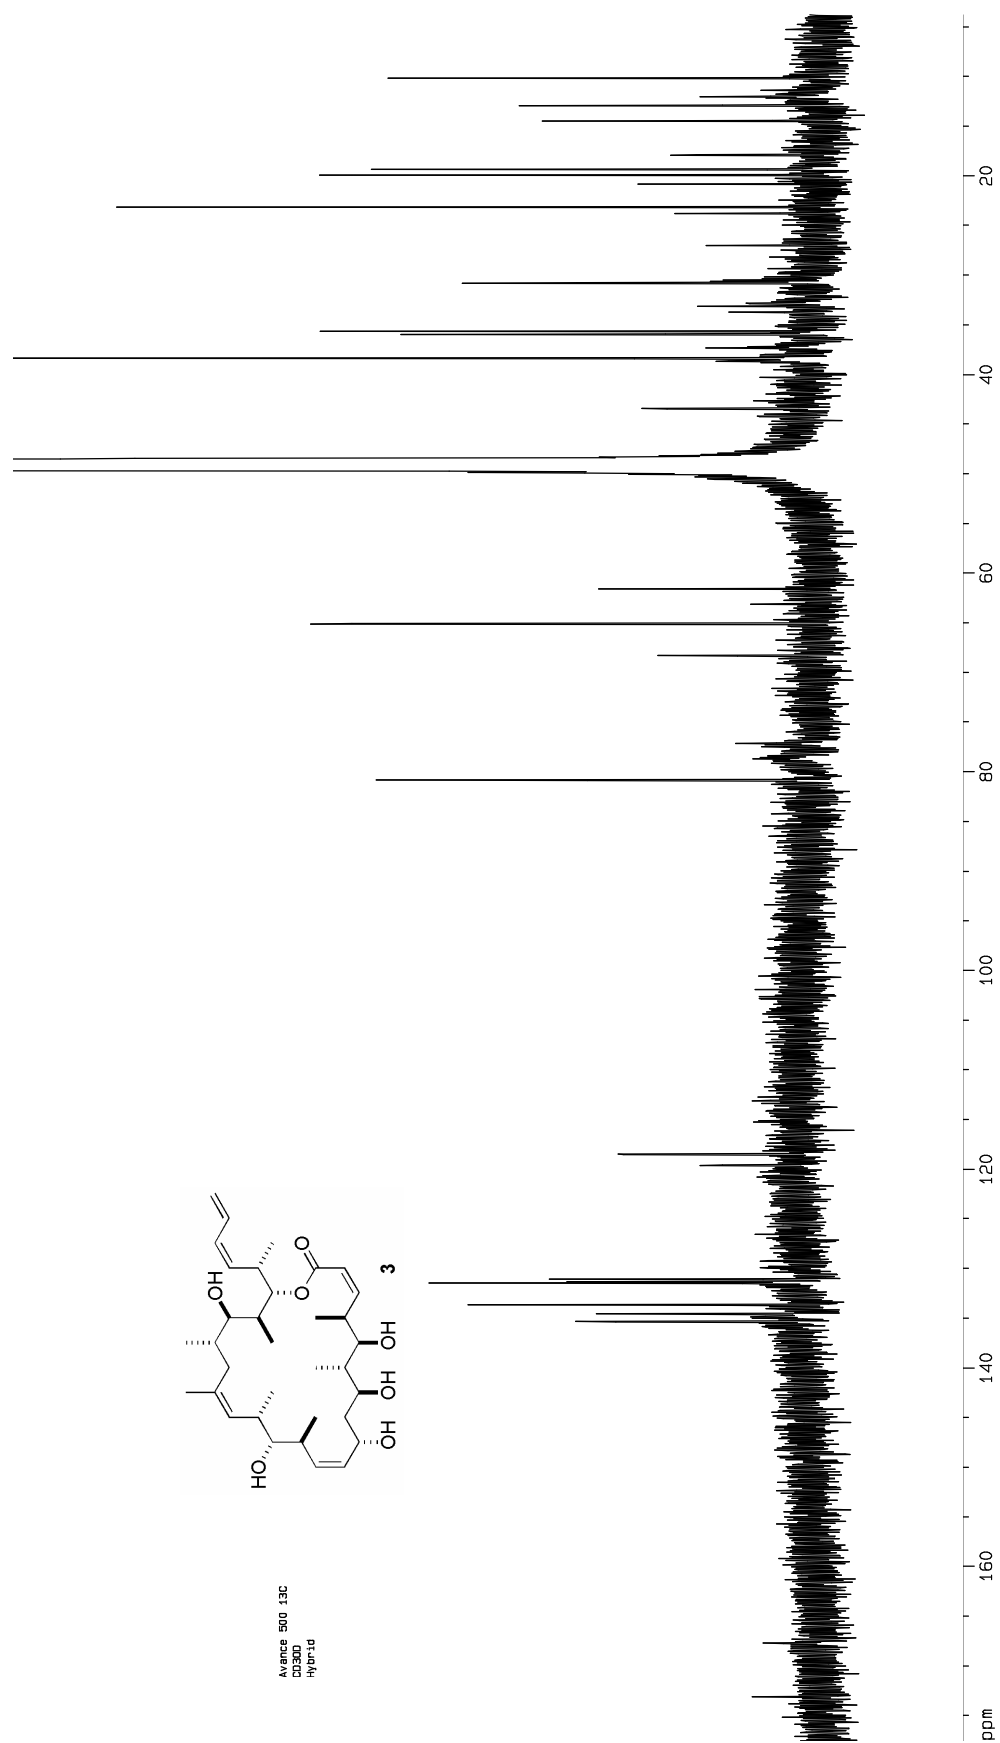

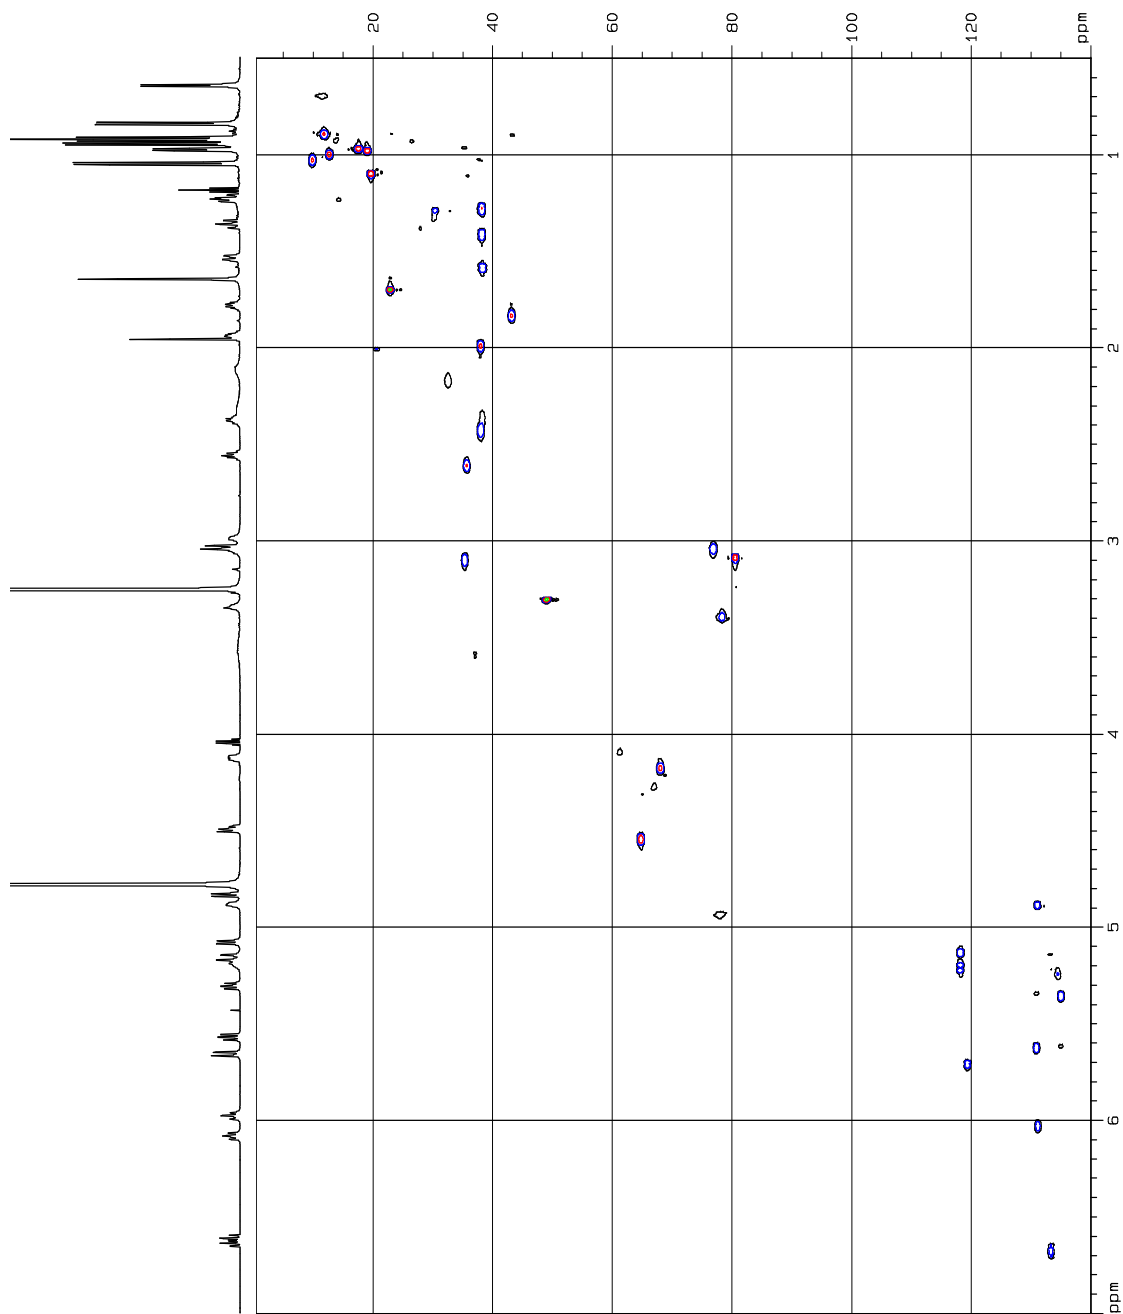

Cryoprobe HSQC Avance 700  
CD300  
Hybrid HSQC

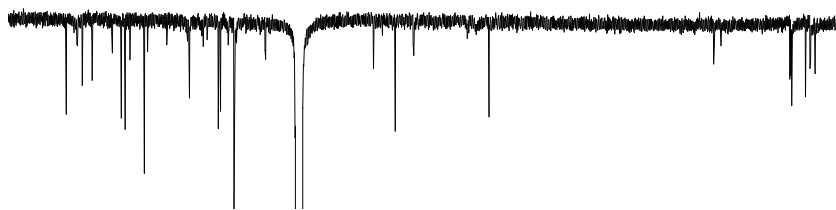

Supplement: b615122a-2.pdf [file b615122a-2.pdf]
